# Supplementary material for: Life Cycle Stage-Specific Accessibility of Leishmania donovani Chromatin at Transcription Start Regions
Source: PubMed Central journal article supplement (PMC8409730; doi:10.1128/msystems.00628-21), 2021-07-20
Supplement: msystems.00628-21-sf001.pdf [file msystems.00628-21-sf001.pdf]

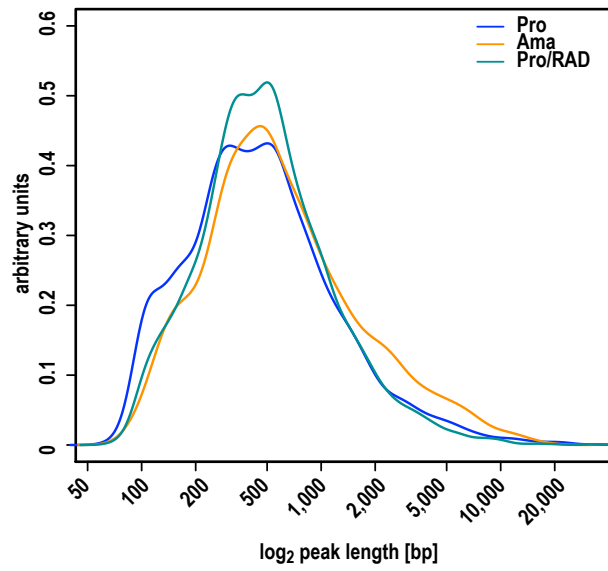

**Figure S1. Frequency distribution of peak lengths.** Peak lengths derived from Genrich peak calling were plotted against their relative frequencies for promastigotes (Pro, blue), axenic amastigotes (Ama, orange) and RAD-treated promastigotes (Pro/RAD, green).
