# Supplementary material for: Life Cycle Stage-Specific Accessibility of Leishmania donovani Chromatin at Transcription Start Regions
Source: PubMed Central journal article supplement (PMC8409730; doi:10.1128/msystems.00628-21), 2021-07-20
Supplement: msystems.00628-21-st001.pdf [file msystems.00628-21-st001.pdf]

| Sample       | Reads     | Trimmed  | Aligned |
|--------------|-----------|----------|---------|
| Pro          | 46861085  | 41341135 | 83.18%  |
|              | 50964607  | 45292610 | 83.97%  |
| Ama          | 101234567 | 91143536 | 43.42%  |
|              | 56613102  | 50688537 | 45.67%  |
| Pro/RAD      | 52507739  | 46491400 | 77.20%  |
|              | 70559742  | 62331332 | 80.26%  |
| gDNA control | 53306328  | 46518293 | 95.04%  |
|              | 59116619  | 51116634 | 94.81%  |

**Table S1. ATAC-seq output.** Two biological replicates each were used for sequencing of promastigotes (Pro), amastigotes (Ama), RAD-treated promastigotes (Pro/RAD) and gDNA controls. Numbers of total reads, number of reads after adapter trimming and percentage of reads aligned to the *L. donovani* reference genome are listed.
