# Supplementary material for: Life Cycle Stage-Specific Accessibility of Leishmania donovani Chromatin at Transcription Start Regions
Source: PubMed Central journal article supplement (PMC8409730; doi:10.1128/msystems.00628-21), 2021-07-20
Supplement: msystems.00628-21-st002.pdf [file msystems.00628-21-st002.pdf]

**Table S2. ATAC peak coverage at tRNA genes.**

| Gene-ID        | Lengths (bp) | ATAC Peaks (%)<br>Pro | ATAC Peaks (%)<br>Ama | ATAC Peaks (%)<br>Pro/RAD |
|----------------|--------------|-----------------------|-----------------------|---------------------------|
| LdBPK_03tRNA1  | 73           | 100                   | 100                   | 100                       |
| LdBPK_05tRNA1  | 72           | 100                   | 100                   | 100                       |
| LdBPK_07tRNA1  | 62           | 100                   | 100                   | 100                       |
| LdBPK_09tRNA1  | 72           | 100                   | 100                   | 100                       |
| LdBPK_09tRNA2  | 83           | 100                   | 100                   | 100                       |
| LdBPK_09tRNA3  | 76           | 100                   | 100                   | 100                       |
| LdBPK_09tRNA4  | 71           | 100                   | 100                   | 100                       |
| LdBPK_09tRNA5  | 73           | 100                   | 100                   | 100                       |
| LdBPK_09tRNA6  | 72           | 100                   | 100                   | 100                       |
| LdBPK_09tRNA7  | 76           | 100                   | 100                   | 100                       |
| LdBPK_09tRNA8  | 72           | 100                   | 100                   | 100                       |
| LdBPK_09tRNA9  | 71           | 100                   | 100                   | 100                       |
| LdBPK_10tRNA1  | 73           | 100                   | 100                   | 100                       |
| LdBPK_10tRNA2  | 71           | 100                   | 100                   | 100                       |
| LdBPK_10tRNA3  | 73           | 100                   | 100                   | 100                       |
| LdBPK_11tRNA1  | 72           | 100                   | 100                   | 100                       |
| LdBPK_11tRNA2  | 73           | 100                   | 100                   | 100                       |
| LdBPK_11tRNA3  | 72           | 100                   | 100                   | 100                       |
| LdBPK_161tRNA1 | 72           | 100                   | 100                   | 100                       |
| LdBPK_17tRNA1  | 72           | 100                   | 100                   | 100                       |
| LdBPK_17tRNA2  | 81           | 100                   | 100                   | 100                       |
| LdBPK_17tRNA3  | 73           | 100                   | 100                   | 100                       |
| LdBPK_21tRNA1  | 81           | 100                   | 100                   | 100                       |
| LdBPK_21tRNA2  | 72           | 100                   | 100                   | 100                       |
| LdBPK_21tRNA3  | 74           | 100                   | 100                   | 100                       |
| LdBPK_21tRNA4  | 73           | 100                   | 100                   | 100                       |
| LdBPK_23tRNA1  | 74           | 100                   | 100                   | 100                       |
| LdBPK_23tRNA10 | 72           | 100                   | 100                   | 100                       |
| LdBPK_23tRNA2  | 73           | 100                   | 100                   | 100                       |
| LdBPK_23tRNA3  | 72           | 100                   | 100                   | 100                       |
| LdBPK_23tRNA4  | 72           | 100                   | 100                   | 100                       |
| LdBPK_23tRNA5  | 83           | 100                   | 100                   | 100                       |
| LdBPK_23tRNA6  | 72           | 100                   | 100                   | 100                       |
| LdBPK_23tRNA7  | 72           | 100                   | 100                   | 100                       |

**Table S2. ATAC peak coverage at tRNA genes.**

| Gene-ID        | Lengths (bp) | ATAC Peaks (%)<br>Pro | ATAC Peaks (%)<br>Ama | ATAC Peaks (%)<br>Pro/RAD |
|----------------|--------------|-----------------------|-----------------------|---------------------------|
| LdBPK_23tRNA8  | 73           | 100                   | 100                   | 100                       |
| LdBPK_23tRNA9  | 72           | 100                   | 100                   | 100                       |
| LdBPK_24tRNA1  | 72           | 100                   | 100                   | 100                       |
| LdBPK_24tRNA2  | 72           | 100                   | 100                   | 100                       |
| LdBPK_24tRNA3  | 82           | 100                   | 100                   | 100                       |
| LdBPK_24tRNA4  | 136          | 100                   | 100                   | 100                       |
| LdBPK_24tRNA5  | 72           | 100                   | 100                   | 100                       |
| LdBPK_29tRNA1  | 82           | 100                   | 100                   | 100                       |
| LdBPK_29tRNA2  | 81           | 100                   | 100                   | 100                       |
| LdBPK_30tRNA1  | 72           | 100                   | 100                   | 100                       |
| LdBPK_31_tRNA1 | 73           | 100                   | 100                   | 100                       |
| LdBPK_31_tRNA2 | 71           | 100                   | 100                   | 100                       |
| LdBPK_31_tRNA3 | 72           | 100                   | 100                   | 100                       |
| LdBPK_31_tRNA4 | 73           | 100                   | 100                   | 100                       |
| LdBPK_31_tRNA5 | 81           | 100                   | 100                   | 100                       |
| LdBPK_33tRNA1  | 73           | 100                   | 100                   | 100                       |
| LdBPK_33tRNA2  | 73           | 100                   | 100                   | 100                       |
| LdBPK_33tRNA3  | 72           | 100                   | 100                   | 100                       |
| LdBPK_34tRNA1  | 74           | 100                   | 100                   | 100                       |
| LdBPK_34tRNA2  | 74           | 100                   | 100                   | 100                       |
| LdBPK_34tRNA3  | 73           | 100                   | 100                   | 100                       |
| LdBPK_34tRNA4  | 80           | 100                   | 100                   | 100                       |
| LdBPK_34tRNA5  | 81           | 100                   | 100                   | 100                       |
| LdBPK_34tRNA6  | 7            | 100                   | 100                   | 100                       |
| LdBPK_36tRNA1  | 72           | 100                   | 100                   | 100                       |
| LdBPK_36tRNA2  | 72           | 100                   | 100                   | 100                       |
| LdBPK_36tRNA3  | 72           | 100                   | 100                   | 100                       |
| LdBPK_36tRNA4  | 82           | 100                   | 100                   | 100                       |
| LdBPK_36tRNA5  | 72           | 100                   | 100                   | 100                       |
| LdBPK_36tRNA6  | 72           | 100                   | 100                   | 100                       |
