# Supplementary material for: Life Cycle Stage-Specific Accessibility of Leishmania donovani Chromatin at Transcription Start Regions
Source: PubMed Central journal article supplement (PMC8409730; doi:10.1128/msystems.00628-21), 2021-07-20
Supplement: msystems.00628-21-st003.pdf [file msystems.00628-21-st003.pdf]

**Table S3. ATAC peak coverage at rRNA genes.**

| Gene-ID       | Lengths (bp) | ATAC Peaks (%)<br>Pro | ATAC Peaks (%)<br>Ama | ATAC Peaks (%)<br>Pro/RAD |
|---------------|--------------|-----------------------|-----------------------|---------------------------|
| LdBPK_05rRNA2 | 81           | 100                   | 100                   | 100                       |
| LdBPK_09rRNA1 | 116          | 100                   | 100                   | 100                       |
| LdBPK_09rRNA2 | 68           | 100                   | 100                   | 100                       |
| LdBPK_09rRNA3 | 303          | 100                   | 100                   | 100                       |
| LdBPK_11rRNA1 | 99           | 100                   | 100                   | 77                        |
| LdBPK_21rRNA1 | 231          | 100                   | 100                   | 100                       |
| LdBPK_23rRNA1 | 120          | 100                   | 100                   | 100                       |
| LdBPK_27rRNA3 | 213          | 100                   | 100                   | 100                       |
| LdBPK_27rRNA4 | 1782         | 100                   | 100                   | 100                       |
| LdBPK_27rRNA5 | 262          | 100                   | 100                   | 100                       |
| LdBPK_27rRNA6 | 1549         | 100                   | 100                   | 100                       |
